# Supplementary material for: Intra-Patient Evolution of HIV-2 Molecular Properties
Source: MDPI journal article supplement (doi:10.3390/v14112447), 2022-11-04
Supplement: s1 [file s1]

# **Intra-Patient Evolution of HIV-2 Molecular Properties**

Angelica A. Palm<sup>1, 2</sup>, Joakim Esbjörnsson<sup>2, 3</sup>, Anders Kvist<sup>4</sup>, Fredrik Månsson<sup>2</sup>, Antonio Biague<sup>5</sup>, Hans Norrgren<sup>4</sup>, Marianne Jansson<sup>1</sup> and Patrik Medstrand<sup>2</sup>

<sup>1</sup> Department of Laboratory Medicine, Lund University, Lund, Sweden

<sup>2</sup> Department of Translational Medicine, Lund University, Lund, Sweden

<sup>3</sup> Nuffield Department of Medicine, University of Oxford, Oxford, UK

<sup>4</sup> Department of Clinical Sciences, Lund University, Lund, Sweden

<sup>5</sup> National Public Health Laboratory, Bissau, Guinea-Bissau

***SUPPLEMENTARY FILE 1***

## **1. Material and methods**

### *1.1. Study population*

This study included individuals from a large cohort of police officers in Guinea-Bissau, West Africa which was formed in 1990 and has been described in detail elsewhere [1, 2]. At inclusion, and at follow-up visits scheduled with an interval of 12-18 months, individuals were examined and a blood sample was collected. The civil war in 1998-1999 temporarily closed inclusion from June 1998 until the end of 2000 but annual visits of previously included patients was resumed in July 2000. The cohort was followed routinely until February 2011 when the cohort was closed. However, in September 2013 selected individuals from the cohort were asked to participate in a special sampling round, including a clinical examination and the collection of a blood sample. HIV testing was performed at the National Public Health Laboratory (LNSP), Bissau, as previously described [2]. The cohort includes 438 HIV-2 infected individuals of whom 83 individuals have an estimated date of seroconversion, defined as the midpoint between the last HIV-2 seronegative and the first seropositive sample. Individuals with long follow-up series, including both CD4% measurements and available plasma samples were considered for inclusion into the study. However, our initial goal was to conduct this study by including only individuals with estimated dates of infection. Thus, amplification of viral RNA was attempted on plasma samples from seroincident individuals for whom three or more longitudinal plasma samples were available (n=19). As expected, due to the general low viral load in HIV-2 infections, amplification was only successful for a minority of samples and only seven individuals with two or more successfully amplified longitudinal samples could be included in the study. We therefore decided to also include seroprevalent individuals in the study. Due to the difficulties amplifying viral RNA only individuals with more than six available plasma samples were considered for inclusion. Amplification was attempted on samples from 19 individuals and successful amplification of two or more longitudinal samples was achieved for nine individuals. Taken together, amplification was attempted on samples from 38 individuals, but only 16 individuals fulfilled the inclusion criteria of two amplified longitudinal samples (total 53 samples) (Table S1).

The 16 included individuals have previously been classified as faster or slower progressors based on three different stratifications [3]. The three stratifications were all based on longitudinal CD4% measurements, and faster and slower progressors were defined by a value above or below the mean of all included individuals. The first stratification, referred to as CD4% decline rate, was based on CD4% decline over time during the asymptomatic, treatment-naïve phase of infection and classified nine individuals as faster progressors and seven individuals as slower progressors. As not only CD4% decline rate but also the level of CD4% may influence disease outcome [4], we also included this parameter to define different progressor groups. In the second stratification, referred to as CD4% level, we calculated the CD4% level at the midpoint in time between the first and last amplified sample using the regression coefficient generated in the first stratification. This stratification classified 10 individuals as faster progressors and six individuals as slower progressors. The third stratification, referred to as the combined coefficient, combined the two previous stratifications, taking both CD4% decline rate and level into consideration. The regression coefficient and CD4% values were transformed and rescaled to have equal influence on the combined coefficient. The combined coefficient generated identical groups as the CD4% level, but the individual rankings varied within the groups.

### *1.2. Amplification and sequencing*

Viral RNA was extracted from 200 µl of plasma by disruption in 2000 µl Qiazol, using the miRNeasy micro kit (Qiagen, Stockholm, Sweden) with minor modifications to the manufacturer's instructions. RNA was loaded onto an RNeasy MinElute Spin column in the presence of 15 µg carrier RNA and an on-column DNase-treatment (Qiagen) was used to

remove DNA. The RNA was washed and subsequently eluted in 22 µl RNase-free H<sub>2</sub>O. Amplification was performed on 9.5 µl RNA using the SuperScript III One-Step RT-PCR System with Platinum Taq DNA polymerase followed by a semi-nested PCR using Platinum Taq High Fidelity (both from Invitrogen, Copenhagen, Denmark). One-Step PCR was performed using primers KH2\_OF (5'-GAGACATCAATAAAACCATGTGTC -3') and TH2\_OR (5'- TTCTGCCACCTCTGCACTAAAGG-3') and primers KH2\_OF and KH2\_OR (5'-ACCCAATTGAGGAACCAAGTCA-3') were used for semi-nested PCR [5, 6]. Following the initial cDNA synthesis for 30 min at 50°C, the PCR conditions were identical for One-Step PCR and nested PCR: initial denaturation for 2 min at 94°C, 40 cycles of 15 s at 94°C, 30 s at 50°C, 1 min at 68°C and a final elongation step for 5 min at 68°C. Amplification resulted in an approximate 935 nucleotide (nt) fragment including the entire V1-C3 region of *env* and small fractions of C1 and V4 regions (nucleotides 6986 to 7920 in BEN; GenBank accession number M30502). Molecular cloning of the amplified fragments was performed by BaseClear BV, (Leiden, The Netherlands), using a pCR2.1-TOPO-TA vector. Routinely, 12 individual clones were sequenced in both directions using conventional M13 primers.

### 1.3. Sequence analysis

Sequences were manual editing and aligned using CodonCode Aligner v1.5.2 (CodonCode Corporation, Dedham, USA) and MEGA 5 (by use of the Clustal W algorithm), respectively [7]. A pairwise homoplasy index (PHI) test using an exhaustive and iterative search algorithm was used to identify putative intra-patient recombinant sequences (the Perl script for the iterative search is available from the authors upon request). Recombinant sequences were removed in a progressive manner until the *p*-value was > 0.05.

## 2. Results

### 2.1. Mixed model analyses of HIV-2 evolution based on the CD4% decline rate stratification

The individuals included in this study were previously stratified into faster or slower progressors, based on CD4% dynamics [3]. Faster and slower progressors were defined based on three different stratifications; CD4% decline rate, CD4% level and a combined coefficient (Table 1, Supplementary file 1 Material and methods, and [3]). Previously, we found a strong association between evolutionary rate and the CD4% level and the combined coefficient stratifications but not with the CD4% decline rate. Therefore, the main focus of this study, and the results presented in the main text, are for the CD4% level and the combined coefficient. However, all analyses included in the main text were repeated using the CD4% decline rate stratification and results are presented below.

The relationship between each HIV-2 molecular property (diversity, PNGS, length and charge) and CD4% was initially analyzed using a mixed model including an interaction term between progressor group and CD4% (thus allowing each progressor group to have a different slope for the change of the property with declining CD4% levels). However, the interaction was not significant, i.e. there were no significant differences between groups in the change of each property with declining CD4%, for any of the analyzed properties (Table S3). Hence, we removed the interaction from the model for all subsequent analyses. Next we tested for differences between progressor groups in the estimated mean level of each property. A single significant difference was noted (Table S3): slower progressors had a higher mean number of PNGS in the V1-C3 region compared with faster progressors (net difference = 1.3 PNGS, *p* = 0.049). Note that since the interaction term was removed from the model, the estimated net difference in the property between groups was identical regardless of CD4% level. The number of PNGS decreased significantly with 0.08 PNGS for every percent drop of CD4 (*p* = 0.047 for test of slope different from zero, Table S3).

We also analyzed the evolution of each molecular property over time. Since the timing of sampling in relation to disease progression were not aligned between patients we only tested

for differences in the rate of change of each property over time, and not for differences in level, between progressor groups. The interaction between progressor group and time was not significant for any of the analyzed properties (Table S4), i.e. there were no significant differences between groups in the rate of change of any property over time. When the analyses were repeated excluding the interaction, assuming a common slope for all individuals, we found that diversity increased significantly by  $7.73 \times 10^{-4}$  substitutions/site/year ( $p = 0.042$ ).

## 2.2. Coreceptor use

In the main text we describe the identification of eight sequences where viruses were predicted to use CXCR4 by Geno2Pheno[corecceptor-hiv-2] [8] (Table 4). The individuals that harbored these sequences were from both progressor groups. Thus, no association between coreceptor use and progressor group could be identified using the CD4% decline rate stratification.

## 3. References

1. Norrgren H, Andersson S, Naucier A, Dias F, Johansson I, Biberfeld G: HIV-1, HIV-2, HTLV-I/II and Treponema pallidum infections: incidence, prevalence, and HIV-2-associated mortality in an occupational cohort in Guinea-Bissau. *J Acquir Immune Defic Syndr Hum Retrovirol* 1995, 9:422-428.
2. Mansson F, Biague A, da Silva ZJ, Dias F, Nilsson LA, Andersson S, Fenyo EM, Norrgren H: Prevalence and incidence of HIV-1 and HIV-2 before, during and after a civil war in an occupational cohort in Guinea-Bissau, West Africa. *AIDS* 2009, 23:1575-1582.
3. Palm AA, Lemey P, Jansson M, Mansson F, Kvist A, Szojka Z, Biague A, da Silva ZJ, Rowland-Jones SL, Norrgren H, et al: Low Postseroconversion CD4(+) T-cell Level Is Associated with Faster Disease Progression and Higher Viral Evolutionary Rate in HIV-2 Infection. *mBio* 2019, 8;10(1):e01245-18.
4. Esbjornsson J, Mansson F, Kvist A, Isberg PE, Nowroozalizadeh S, Biague AJ, da Silva ZJ, Jansson M, Fenyo EM, Norrgren H, Medstrand P: Inhibition of HIV-1 disease progression by contemporaneous HIV-2 infection. *N Engl J Med* 2012, 367:224-232.
5. Barroso H, Taveira N: Evidence for negative selective pressure in HIV-2 evolution in vivo. *Infect Genet Evol* 2005, 5:239-246.
6. MacNeil A, Sankale JL, Meloni ST, Sarr AD, Mboup S, Kanki P: Long-term inpatient viral evolution during HIV-2 infection. *J Infect Dis* 2007, 195:726-733.
7. Tamura K, Peterson D, Peterson N, Stecher G, Nei M, Kumar S: MEGA5: molecular evolutionary genetics analysis using maximum likelihood, evolutionary distance, and maximum parsimony methods. *Mol Biol Evol* 2011, 28:2731-2739.
8. Doring M, Borrego P, Buch J, Martins A, Friedrich G, Camacho RJ, Eberle J, Kaiser R, Lengauer T, Taveira N, Pfeifer N: A genotypic method for determining HIV-2 coreceptor usage enables epidemiological studies and clinical decision support. *Retrovirology* 2016, 13:85.

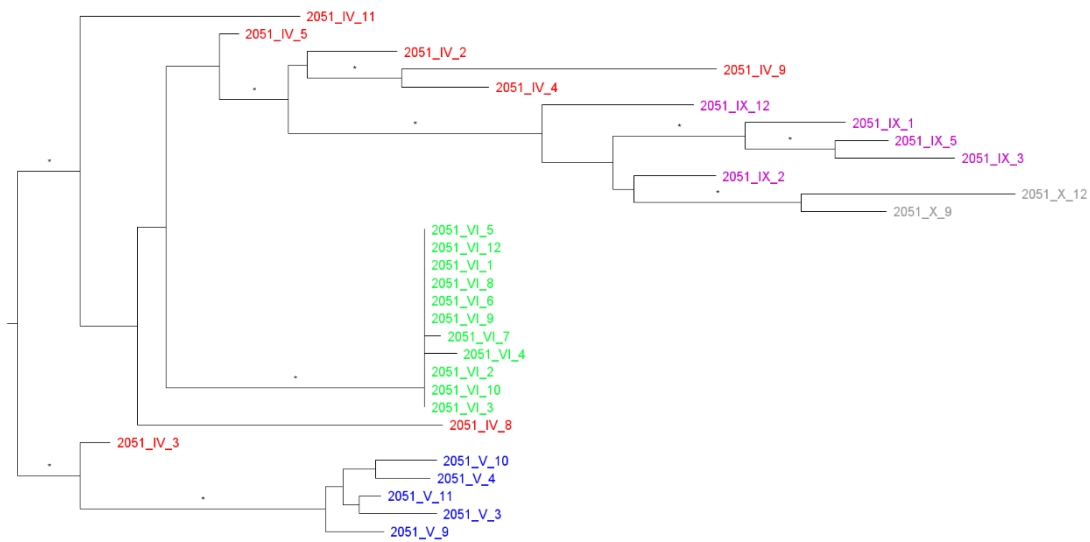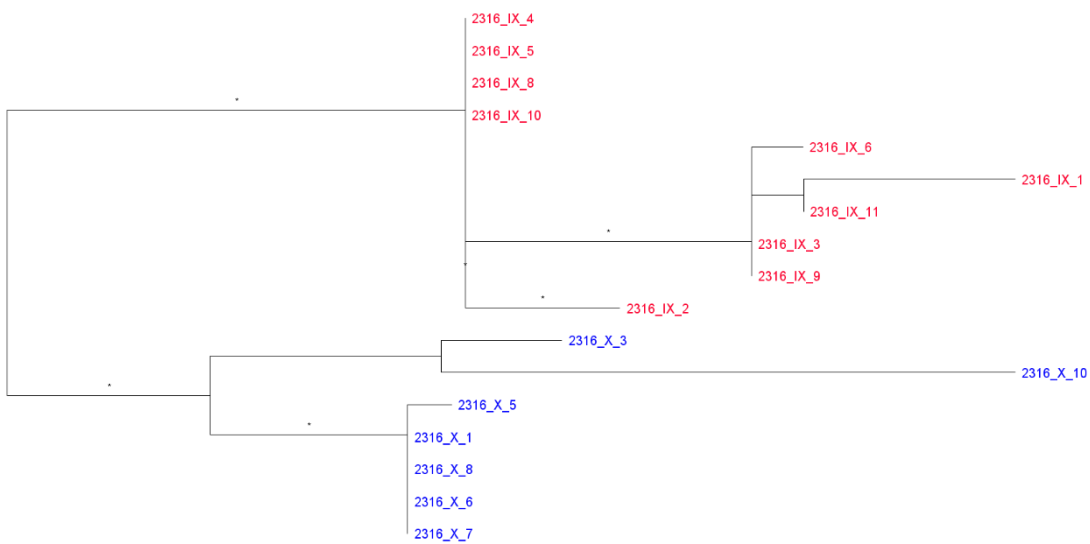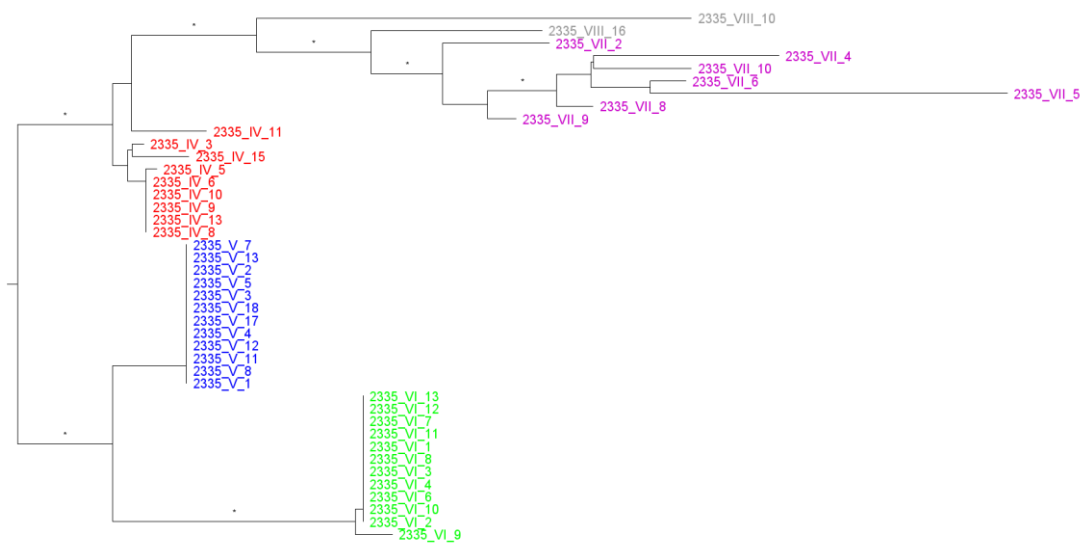

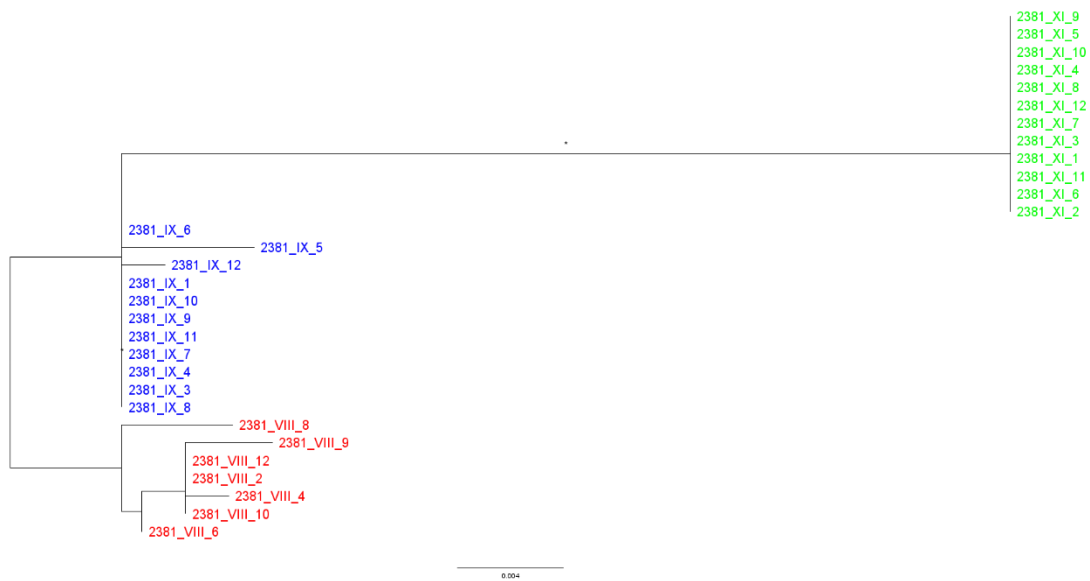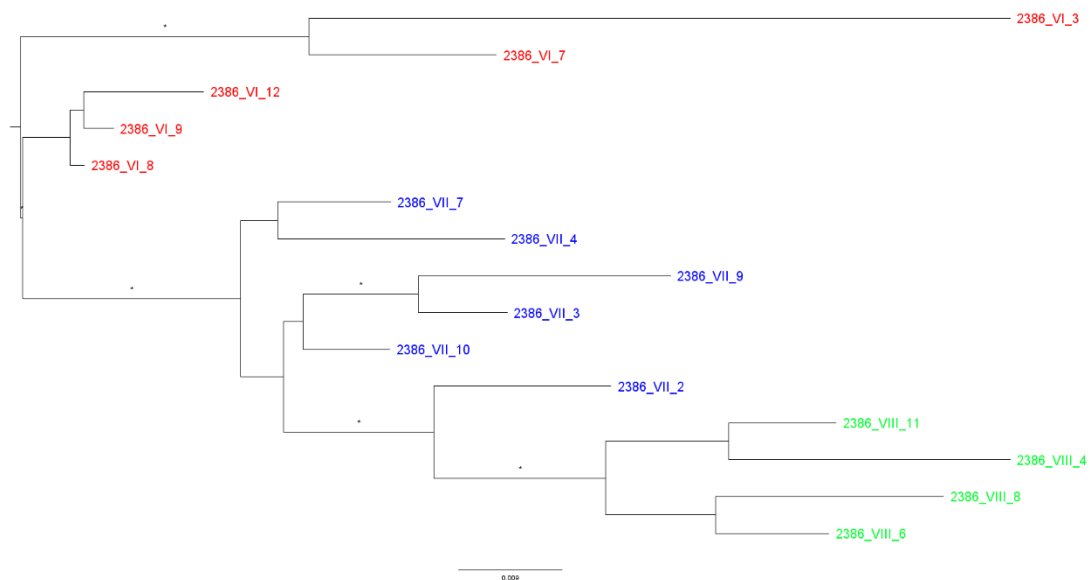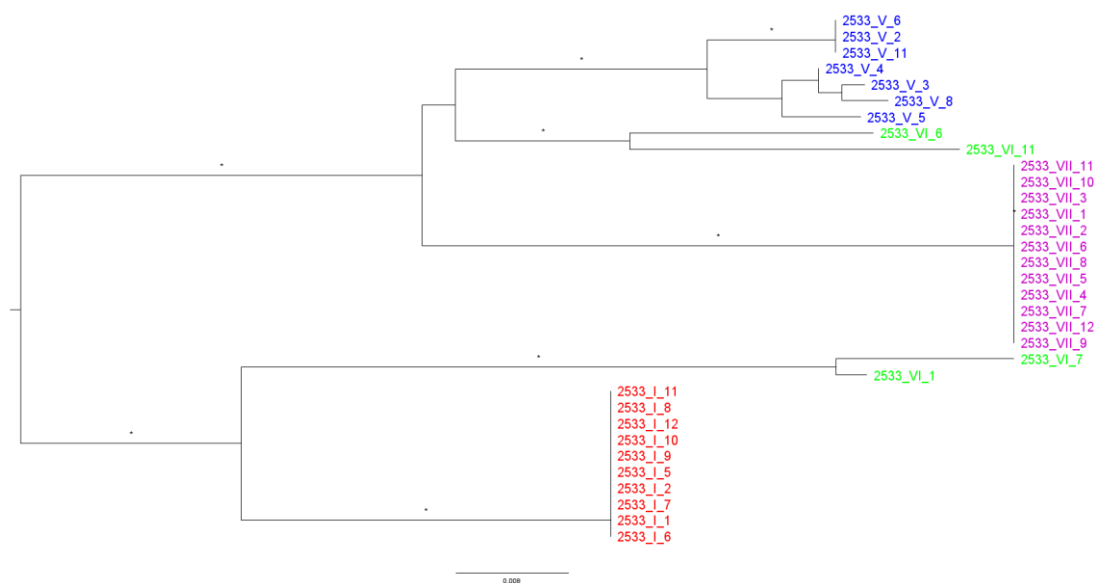

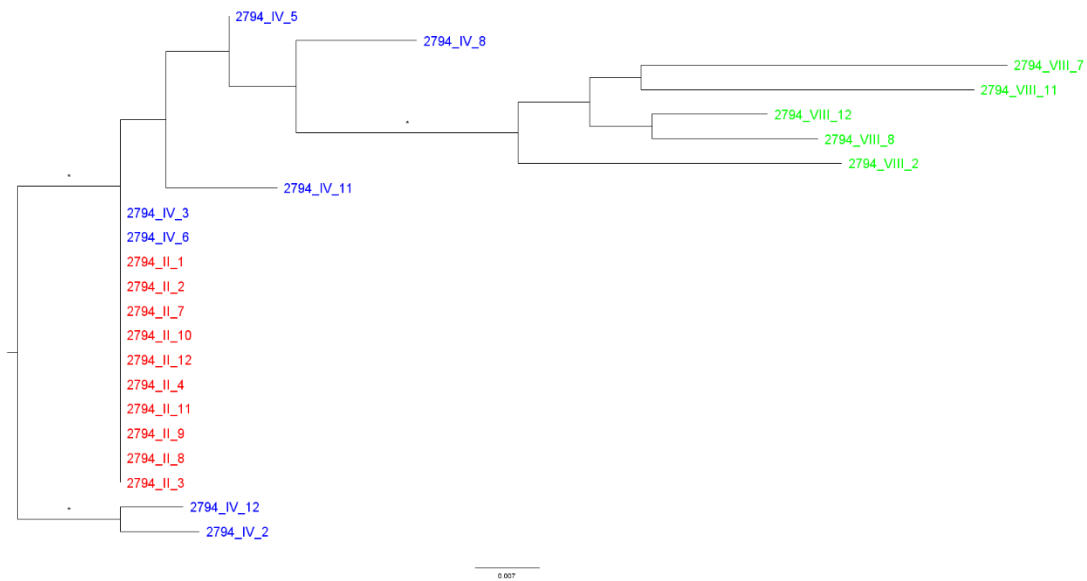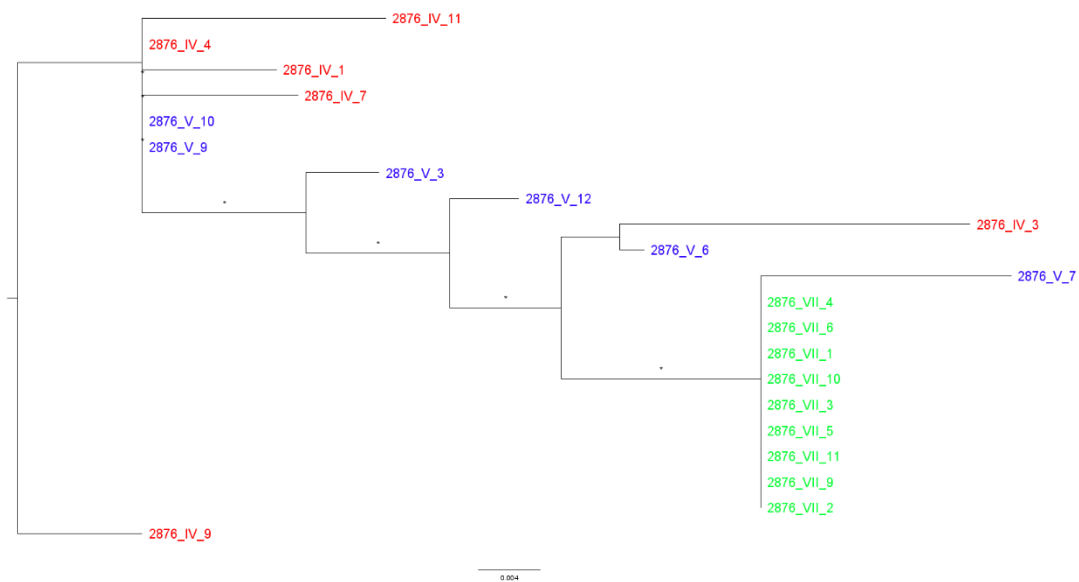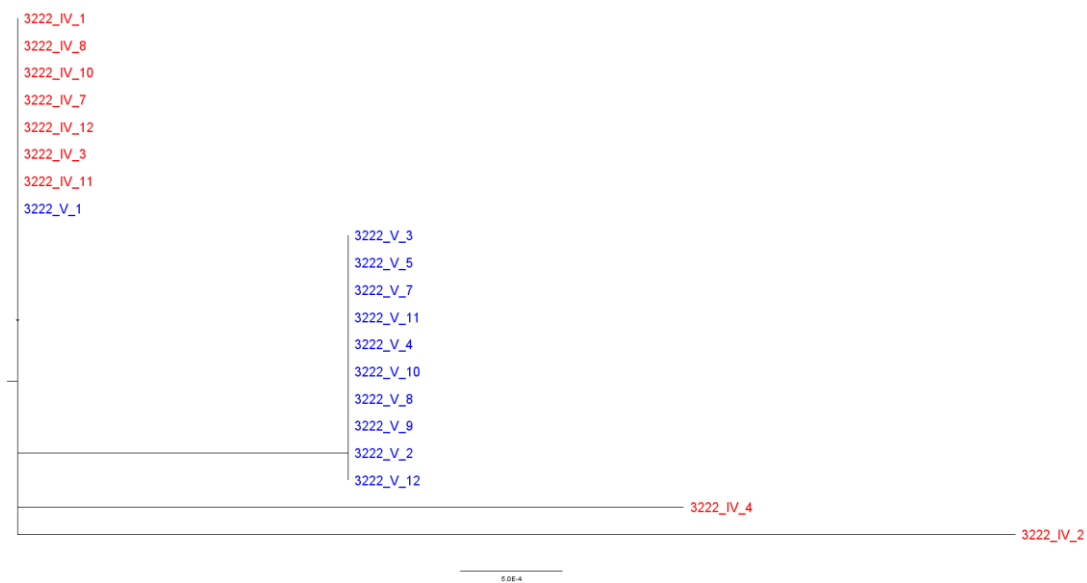

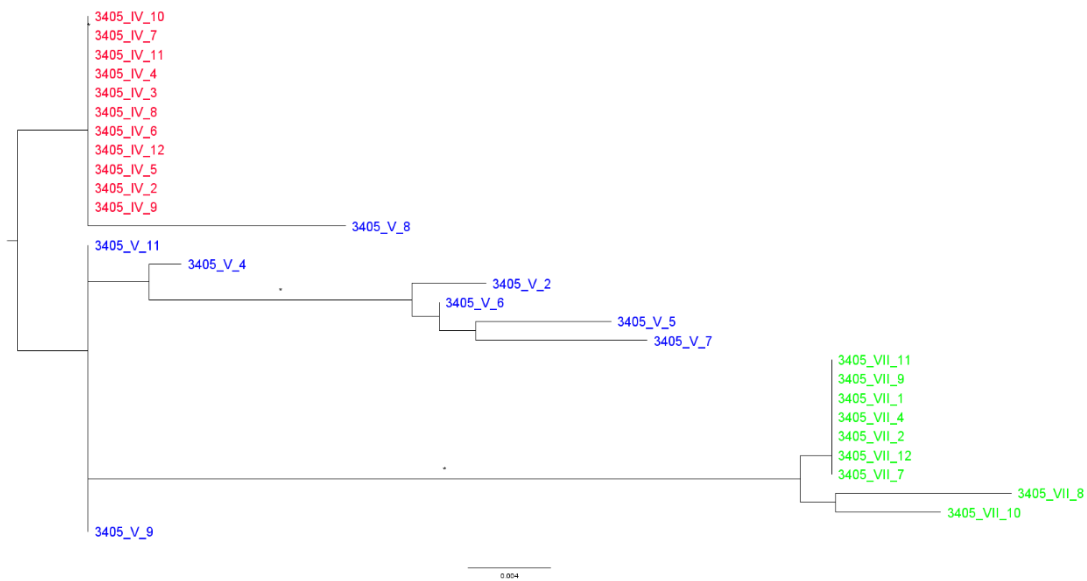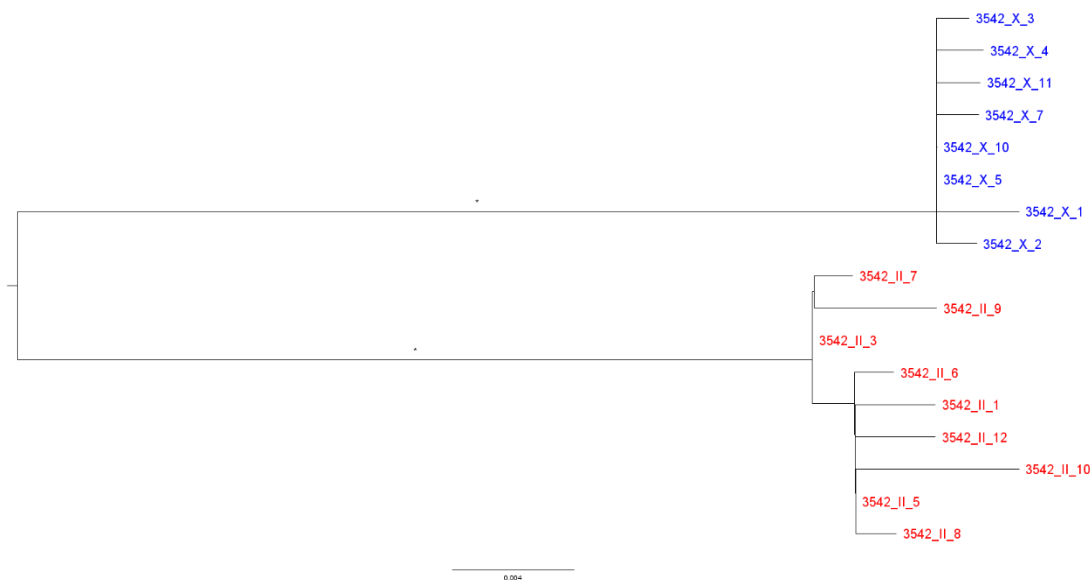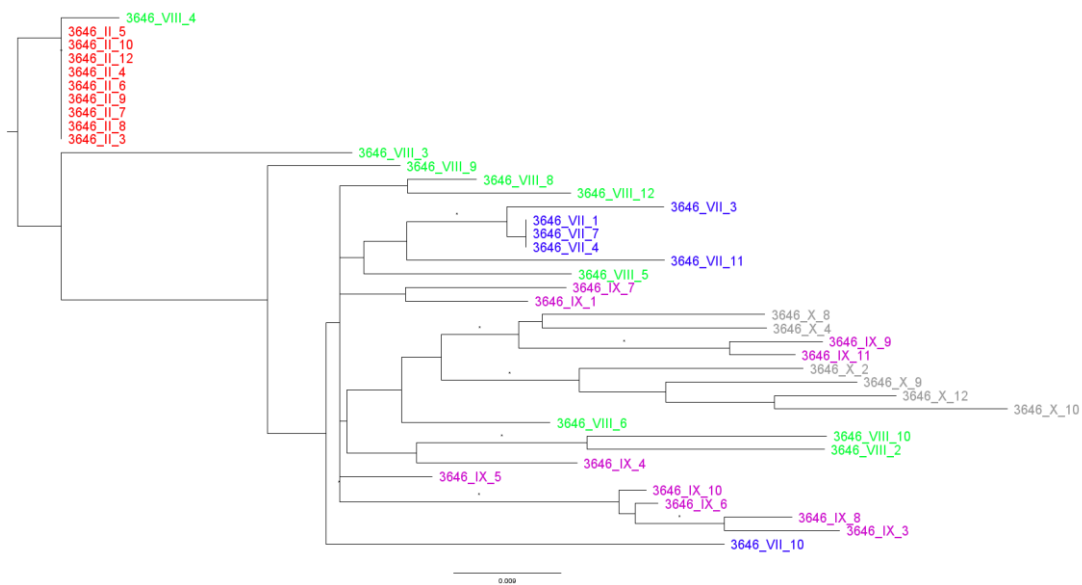



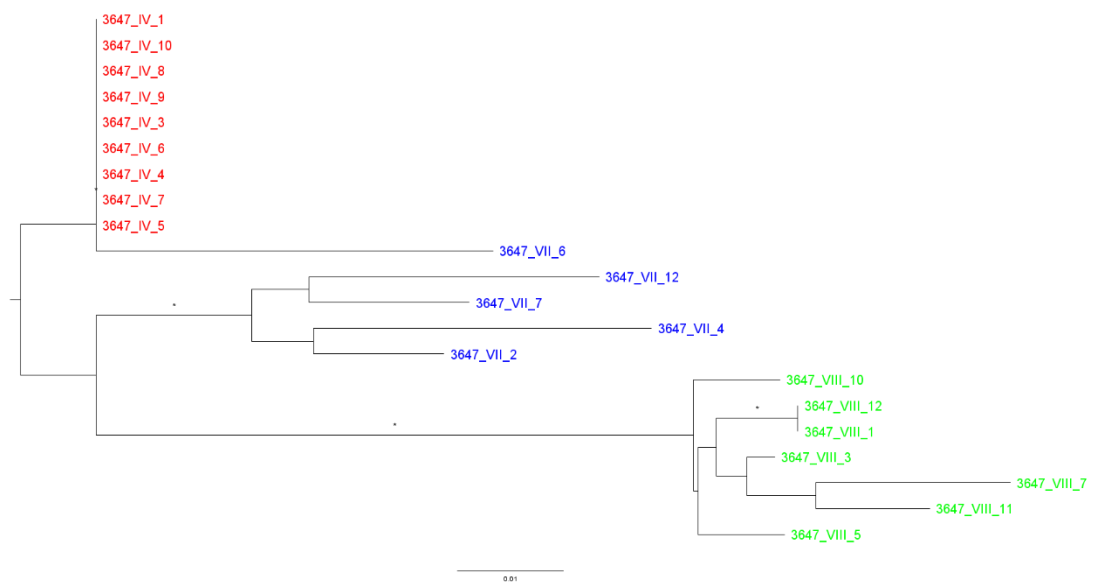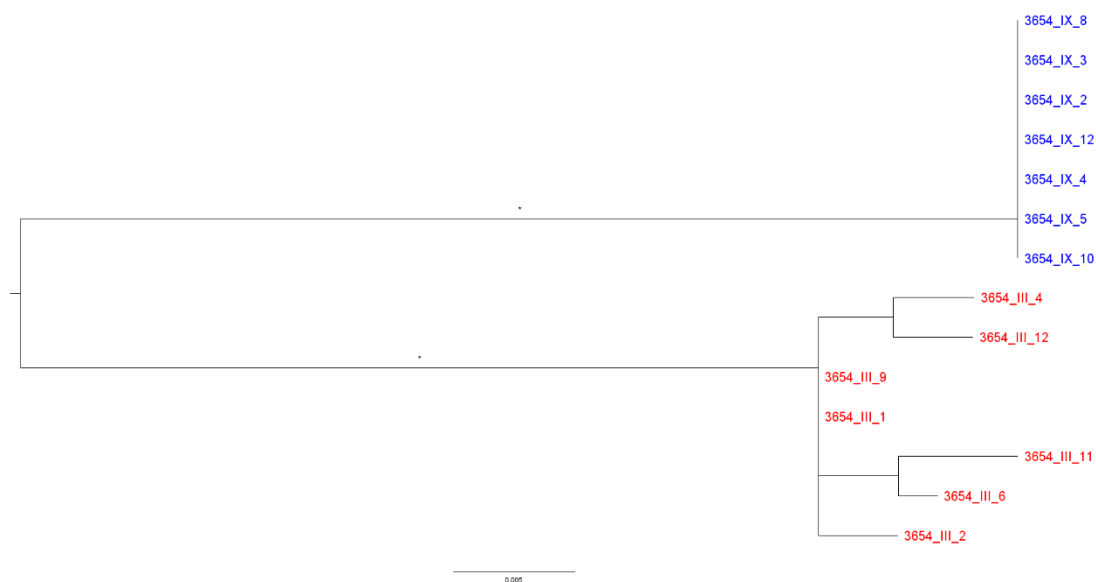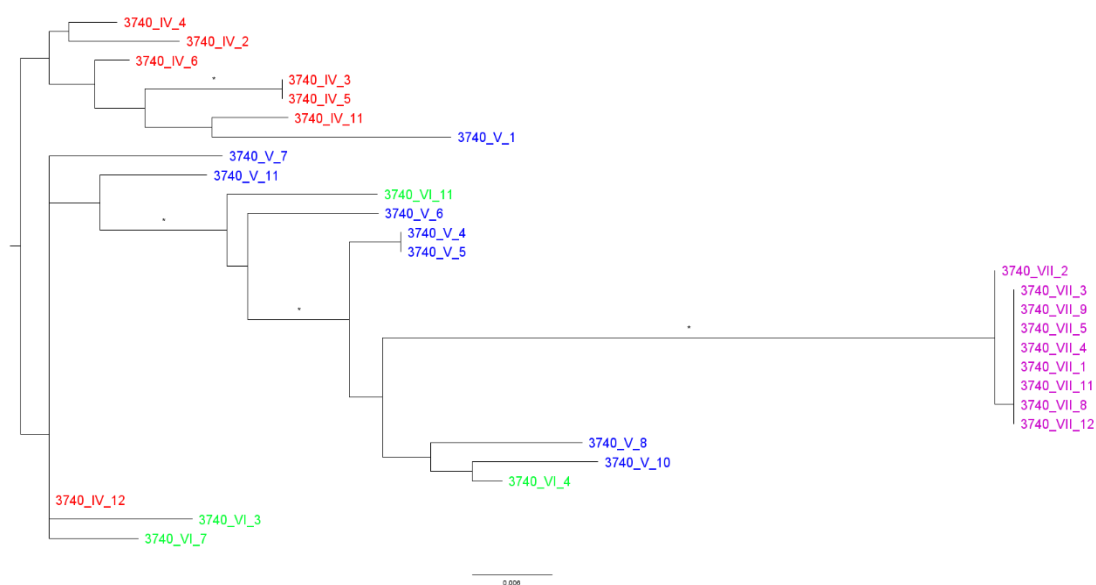

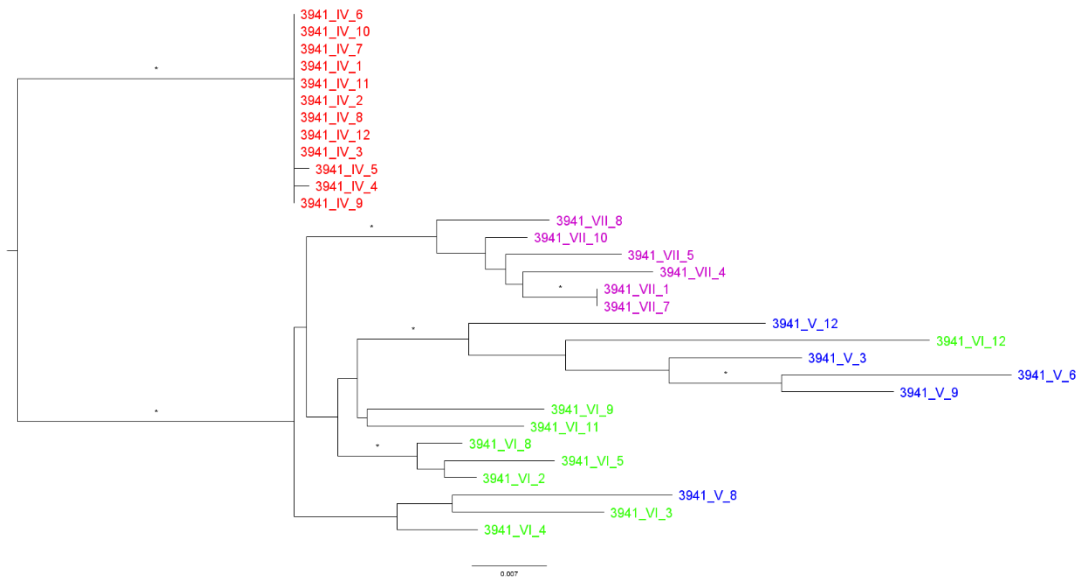

**Figure S1.** Maximum-likelihood (ML) phylogenetic trees reconstructed for each individual separately. The ML-based approximate likelihood ratio test (aLRT) Shimodaira-Hasegawa (SH)-like branch support was used to assess statistical support for internal branches. SH-values above 0.9 were considered statistically significant, indicated by asterisks in the trees. The analyzed samples are color coded as follows: red – first timepoint, blue – second timepoint, green – third timepoint, purple – forth timepoint, grey – fifth timepoint.

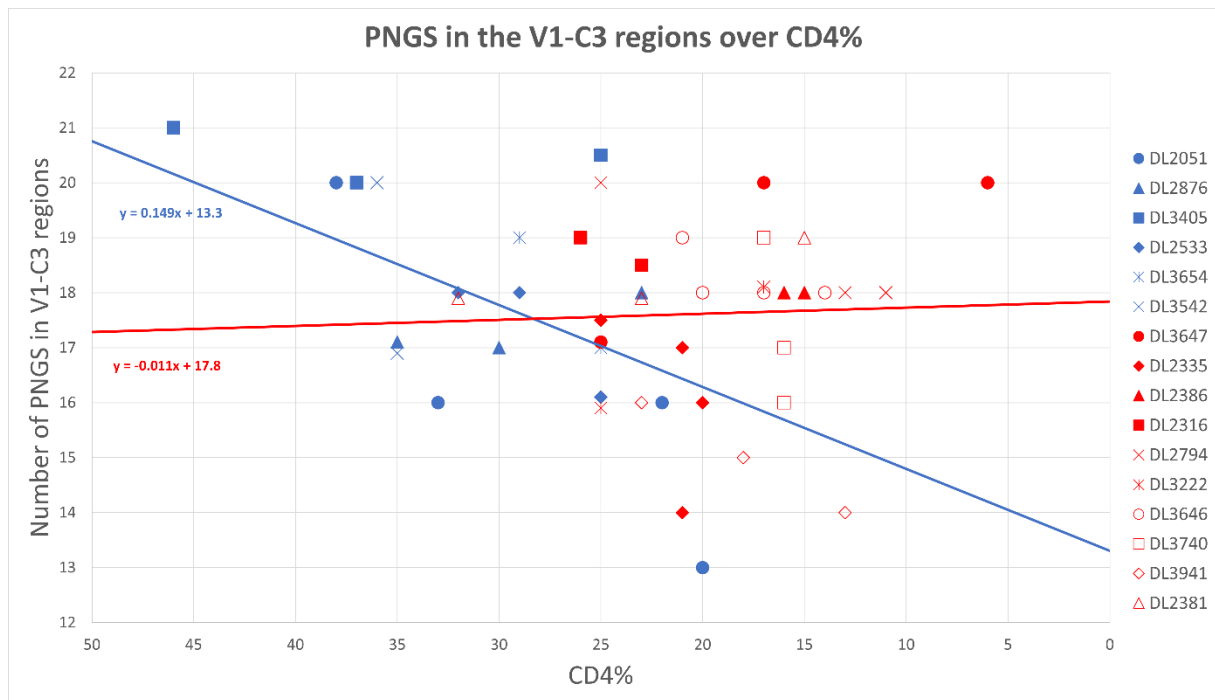

**Figure S2.** Linear mixed model analysis of the number of PNGS in the V1-C3 regions as a function of CD4% as a continuous fixed effect and progressor group (faster and slower progressors) as a categorical fixed effect. The interaction term between CD4% and progressor group was included to allow for a different relationship between PNGS and CD4% in faster and slower progressors. Patient was included as random effect, with the level (intercept) of PNGS (i.e. the dependent variable) allowed to vary between patients. Each data point included in the analysis are presented in the plot, with different markers for each individual. Faster progressors are colored in red and slower progressors in blue. The regression lines represent the group specific model estimates for the linear relationship between PNGS and CD4%.

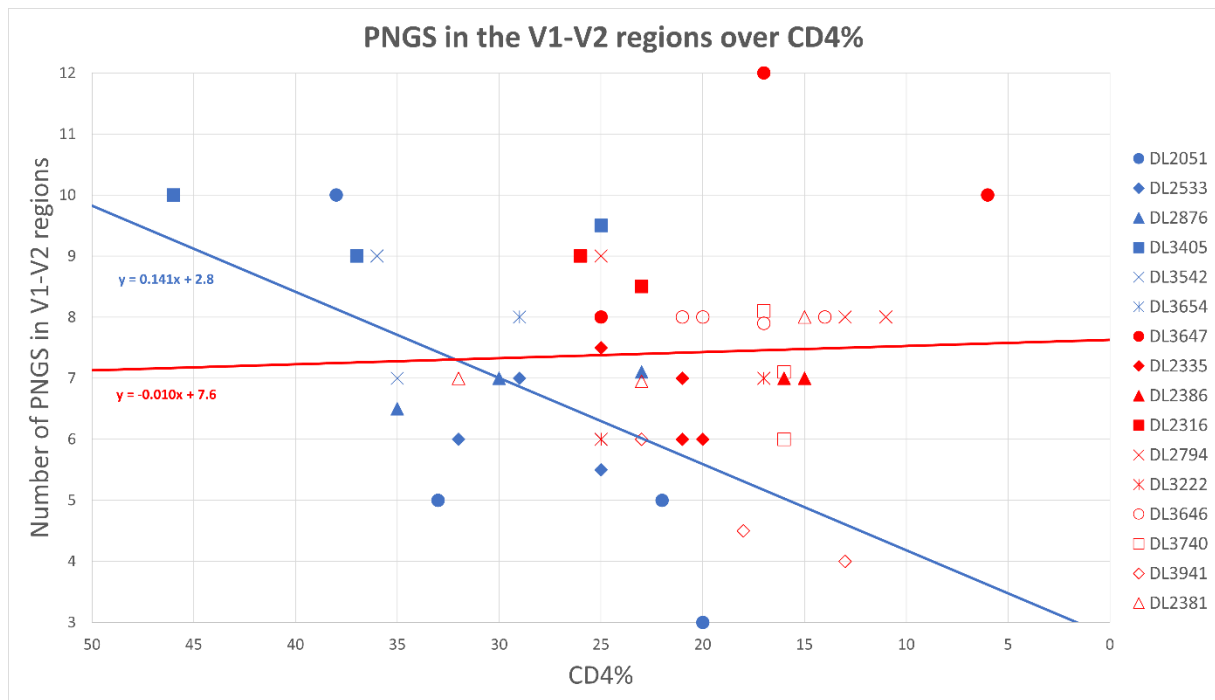

**Figure S3.** Linear mixed model analysis of the number of PNGS in the V1-V2 regions as a function of CD4% as a continuous fixed effect and progressor group (faster and slower progressors) as a categorical fixed effect. The interaction term between CD4% and progressor group was included to allow for a different relationship between PNGS and CD4% in faster and slower progressors. Patient was included as random effect, with the level (intercept) of PNGS (i.e. the dependent variable) allowed to vary between patients. Each data point included in the analysis are presented in the plot, with different markers for each individual. Faster progressors are colored in red and slower progressors in blue. The regression lines represent the group specific model estimates for the linear relationship between PNGS and CD4%.

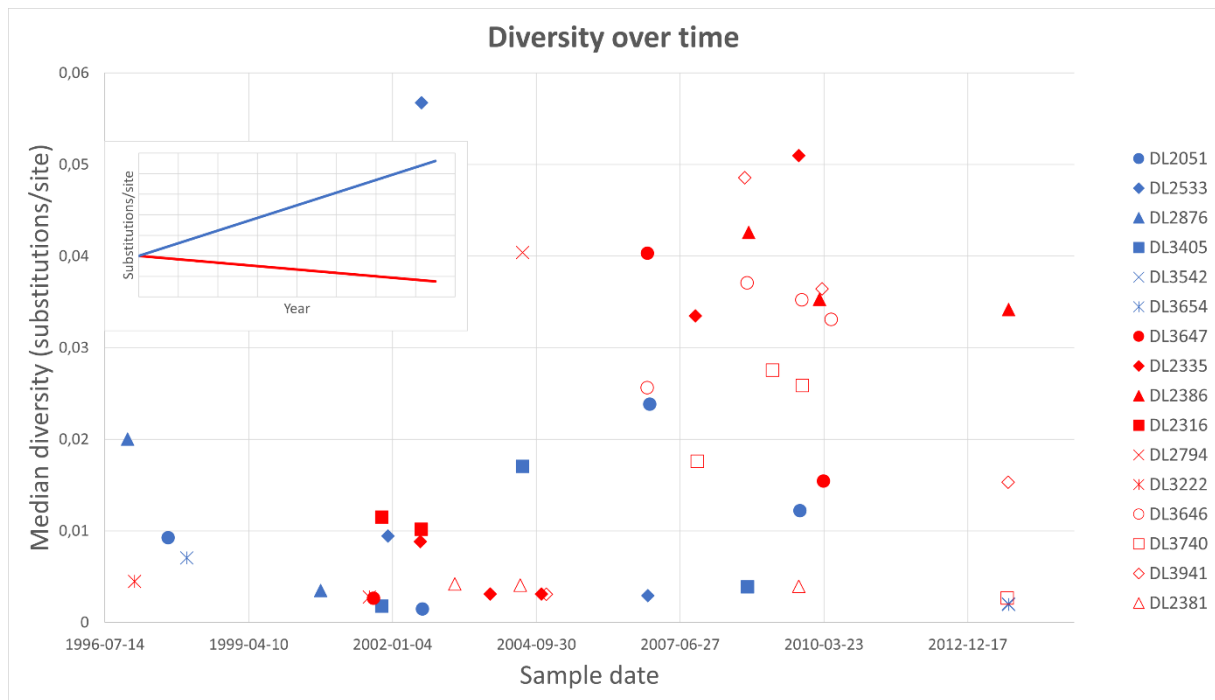

**Figure S4.** Linear mixed model analysis of the median diversity as a function of sample date as a continuous fixed effect and progressor group (faster and slower progressors) as a categorical fixed effect. The interaction term between sample date and progressor group was included to allow for a different relationship between diversity and CD4% in faster and slower progressors. Patient was included as random effect, with the level (intercept) of diversity (i.e. the dependent variable) allowed to vary between patients. Each data point included in the analysis are presented in the plot, with different markers for each individual. Faster progressors are colored in red and slower progressors in blue. Since the timing of sampling in relation to disease progression were not aligned between patients we did not test for differences in intercept. However, mixed model estimates of the rate of change in diversity with time (i.e. slope) did differ between progressor groups and was estimated to  $-4.15 \times 10^{-4}$  for slower progressors and  $1.54 \times 10^{-3}$  for faster progressors (as illustrated in the small inset figure in the top left corner).

**Table S1.** Baseline characteristics of the study participants.

| Individual | Sex | Age at inclusion | Observation time <sup>a</sup> | Date of inclusion <sup>b</sup> | Date of infection <sup>c</sup> | Date of AIDS | Time between follow-up visits <sup>d</sup> |
|------------|-----|------------------|-------------------------------|--------------------------------|--------------------------------|--------------|--------------------------------------------|
| DL3405     | M   | 28               | 188                           | 10-Feb-1993                    | 26-Jun-1999                    |              | 24                                         |
| DL3542     | M   | 29               | 241                           | 18-Aug-1993                    |                                | 13-Nov-2007  | 22                                         |
| DL2051     | M   | 28               | 252                           | 13-Feb-1990                    |                                | 24-Feb-2011  | 25                                         |
| DL2876     | F   | 41               | 174                           | 20-May-1992                    |                                | 07-Dec-2005  | 19                                         |
| DL3654     | F   | 25               | 238                           | 16-Nov-1993                    | 02-Jul-1997                    |              | 24                                         |
| DL2533     | M   | 25               | 201                           | 19-Apr-1991                    |                                | 16-Jan-2008  | 25                                         |
| DL2316     | M   | 26               | 149                           | 17-Jul-1990                    | 08-Jul-1991                    | 22-Jul-2002  | 15                                         |
| DL2794     | M   | 32               | 154                           | 29-Aug-1991                    |                                | 26-Jun-2004  | 19                                         |
| DL3941     | M   | 27               | 226                           | 22-Nov-1994                    | 12-Jun-2000                    | 23-Sep-2013  | 32                                         |
| DL2381     | M   | 29               | 278                           | 19-Jul-1990                    |                                |              | 23                                         |
| DL2335     | M   | 33               | 278                           | 17-Jul-1990                    |                                | 29-Sep-2009  | 28                                         |
| DL3647     | M   | 30               | 196                           | 10-Nov-1993                    |                                | 03-Dec-2003  | 28                                         |
| DL3646     | M   | 38               | 238                           | 10-Nov-1993                    |                                |              | 24                                         |
| DL3222     | M   | 37               | 178                           | 28-Aug-1992                    | 18-May-1994                    |              | 30                                         |
| DL3740     | M   | 39               | 236                           | 25-Jan-1994                    | 10-Jul-2004                    |              | 21                                         |
| DL2386     | M   | 30               | 278                           | 19-Jul-1990                    | 29-Jul-1995                    |              | 31                                         |

<sup>a</sup>The median observation time (in months) from inclusion into the cohort until end-point.

<sup>b</sup>Date of inclusion into the cohort. Seroprevalent individuals were HIV-2 infected at the time of inclusion whereas seroincident individuals were HIV negative at inclusion and subsequently became HIV-2 infected at the estimated date of infection.

<sup>c</sup>Estimated dates of infection, defined as the midpoint between the last HIV-2 seronegative and the first seropositive sample.

<sup>d</sup>The average time (in months) between samples, determined as the time from the first to last sample, divided by the number of follow-up visits.

**Table S2.** Pairwise comparisons of number of PNGS per amino acid in the different regions.

| Comparison  | $p^a$ | Median PNGS<br>first group | Median length<br>(aa) first group | Median PNGS/aa<br>first group | Median PNGS<br>second group | Median length<br>(aa) second group | Median PNGS/aa<br>second group |
|-------------|-------|----------------------------|-----------------------------------|-------------------------------|-----------------------------|------------------------------------|--------------------------------|
| V1-V2 vs C2 | 1.000 | 7                          | 94                                | 0.08                          | 8                           | 99                                 | 0.08                           |
| V1-V2 vs V3 | 0.003 | Red.                       | Red.                              | Red.                          | 1                           | 34                                 | 0.03                           |
| V1-V2 vs C3 | 0.003 | Red.                       | Red.                              | Red.                          | 2                           | 58                                 | 0.03                           |
| C2 vs V3    | 0.001 | Red.                       | Red.                              | Red.                          | Red.                        | Red.                               | Red.                           |
| C2 vs C3    | 0.003 | Red.                       | Red.                              | Red.                          | Red.                        | Red.                               | Red.                           |
| V3 vs C3    | 1.000 | Red.                       | Red.                              | Red.                          | Red.                        | Red.                               | Red.                           |

<sup>a</sup>Significant Friedmans test was followed by Bonferroni corrected Wilcoxon signed rank test for pairwise comparisons between regions.

aa - amino acid

Red. - Redundant value presented previously in the table

**Table S3.** Mixed model estimates of mean diversity, PNGS, fragment length and fragment charge at a CD4% level corresponding to 35% and 14% for faster and slower progressors stratified based on CD4% decline rate and mean rate of change of these properties with change in CD4% (slope).

| Property               | Slope <sup>a</sup>     |                        |          | Slope <sup>b</sup>     |          | CD4% = 35 <sup>c</sup> |         |          | CD4% = 14 <sup>c</sup> |         |          |
|------------------------|------------------------|------------------------|----------|------------------------|----------|------------------------|---------|----------|------------------------|---------|----------|
|                        | Slower                 | Faster                 | <i>p</i> | All individuals        | <i>p</i> | Slower                 | Faster  | <i>p</i> | Slower                 | Faster  | <i>p</i> |
| Diversity              | -6.45x10 <sup>-4</sup> | -2.36x10 <sup>-4</sup> | 0.472    | -4.26x10 <sup>-4</sup> | 0.135    | 0.011                  | 0.013   | 0.752    | 0.020                  | 0.021   | 0.752    |
| V1-C3 PNGS             | 0.077                  | 0.039                  | 0.557    | 0.080                  | 0.047*   | 19.297                 | 17.987  | 0.049*   | 17.623                 | 16.312  | 0.049*   |
| V1-V2 PNGS             | 0.039                  | 0.048                  | 0.880    | 0.067                  | 0.061    | 8.401                  | 7.687   | 0.277    | 6.988                  | 6.274   | 0.277    |
| C2 PNGS                | 0.001                  | 0.007                  | 0.757    | 0.005                  | 0.613    | 7.922                  | 7.782   | 0.466    | 7.822                  | 7.681   | 0.466    |
| V3 PNGS <sup>d</sup>   | -                      | -                      | -        | -                      | -        | -                      | -       | -        | -                      | -       | -        |
| C3 PNGS                | 0.027                  | 0.001                  | 0.159    | 0.012                  | 0.204    | 1.874                  | 1.691   | 0.414    | 1.630                  | 1.447   | 0.414    |
| V1-C3 length           | 0.218                  | -0.123                 | 0.166    | 0.013                  | 0.911    | 285.162                | 284.714 | 0.858    | 284.881                | 284.433 | 0.858    |
| V1-V2 length           | 0.128                  | -0.097                 | 0.313    | 0.005                  | 0.963    | 93.798                 | 93.813  | 0.994    | 93.695                 | 93.710  | 0.994    |
| C2 length <sup>d</sup> | -                      | -                      | -        | -                      | -        | -                      | -       | -        | -                      | -       | -        |
| V3 length <sup>d</sup> | -                      | -                      | -        | -                      | -        | -                      | -       | -        | -                      | -       | -        |
| C3 length <sup>d</sup> | -                      | -                      | -        | -                      | -        | -                      | -       | -        | -                      | -       | -        |
| V1-C3 charge           | 0.028                  | -0.110                 | 0.063    | -0.043                 | 0.237    | 6.637                  | 7.481   | 0.291    | 7.546                  | 8.389   | 0.291    |
| V1-V2 charge           | -0.001                 | -0.082                 | 0.110    | -0.049                 | 0.054    | -3.972                 | -3.530  | 0.521    | -2.939                 | -2.497  | 0.521    |
| C2 charge              | 0.066                  | 0.001                  | 0.061    | 0.027                  | 0.122    | 3.640                  | 3.737   | 0.825    | 3.073                  | 3.170   | 0.825    |
| V3 charge              | -0.026                 | 0.011                  | 0.228    | -0.006                 | 0.565    | 5.245                  | 5.428   | 0.627    | 5.372                  | 5.555   | 0.627    |
| C3 charge              | -0.061                 | -0.047                 | 0.848    | -0.049                 | 0.162    | 1.074                  | 1.483   | 0.521    | 2.111                  | 2.520   | 0.521    |

<sup>a</sup>Results of mixed model analysis including the interaction between CD4% and progressor group, i.e. the model includes a separate slope for the relationship between the property and increasing CD4% for each group. The *p*-value refers to the test of the interaction, i.e. if the relationship between the property and CD4% differ between groups.

<sup>b</sup>Results of mixed model analysis excluding the interaction between CD4% and progressor group, i.e. the model estimates a common slope for the linear relationship between property and increasing CD4% for all individuals of both groups. This analysis was only performed if the interaction was not significant. The *p*-value refers to the test of the common slope versus zero, i.e if the property changes significantly with decreasing CD4%.

<sup>c</sup>Mixed model estimated means for the property at CD4% = 35 and CD4% = 14 for each progressor group. The *p*-value refers to the test of differences in mean between groups. If the interaction term for the complete model was significant, reported values are from the complete model. If the interaction was not significant, reported values are from the simplified model without the interaction. In the latter case, the net difference at both CD4% levels, and the *p*-values for the tests, will be identical.

<sup>d</sup>Analysis not performed due to limited variation of that property between samples.

\*Denotes significant *p*-value.



**Table S4.** Mixed model estimates of mean rates of change per year of diversity, PNGS, fragment length and fragment charge with sampling date (slope) in faster and slower progressors stratified by CD4% decline rate.

| Property               | Slope <sup>a</sup>     |                        | <i>p</i> | Slope <sup>b</sup>     |          |
|------------------------|------------------------|------------------------|----------|------------------------|----------|
|                        | Slower                 | Faster                 |          | All individuals        | <i>p</i> |
| Diversity              | 6.94x10 <sup>-4</sup>  | 8.54x10 <sup>-4</sup>  | 0.831    | 7.73x10 <sup>-4</sup>  | 0.042*   |
| V1-C3 PNGS             | -3.07x10 <sup>-2</sup> | 8.82x10 <sup>-3</sup>  | 0.632    | -1.13x10 <sup>-2</sup> | 0.783    |
| V1-V2 PNGS             | -1.57x10 <sup>-2</sup> | -1.50x10 <sup>-2</sup> | 0.992    | -1.54x10 <sup>-2</sup> | 0.684    |
| C2 PNGS                | -2.69x10 <sup>-4</sup> | 4.62x10 <sup>-3</sup>  | 0.831    | 2.12x10 <sup>-3</sup>  | 0.852    |
| V3 PNGS <sup>c</sup>   | -                      | -                      | -        | -                      | -        |
| C3 PNGS                | -1.20x10 <sup>-2</sup> | 1.66x10 <sup>-2</sup>  | 0.198    | 1.79x10 <sup>-3</sup>  | 0.872    |
| V1-C3 length           | 6.45x10 <sup>-2</sup>  | 2.03x10 <sup>-1</sup>  | 0.561    | 1.33x10 <sup>-1</sup>  | 0.265    |
| V1-V2 length           | 6.01x10 <sup>-2</sup>  | 1.82x10 <sup>-1</sup>  | 0.602    | 1.20x10 <sup>-1</sup>  | 0.303    |
| C2 length <sup>c</sup> | -                      | -                      | -        | -                      | -        |
| V3 length <sup>c</sup> | -                      | -                      | -        | -                      | -        |
| C3 length <sup>c</sup> | -                      | -                      | -        | -                      | -        |
| V1-C3 charge           | 2.51x10 <sup>-3</sup>  | -2.63x10 <sup>-2</sup> | 0.764    | -8.91x10 <sup>-3</sup> | 0.852    |
| V1-V2 charge           | 2.37x10 <sup>-2</sup>  | 7.57x10 <sup>-2</sup>  | 0.435    | 4.94x10 <sup>-2</sup>  | 0.139    |
| C2 charge              | -3.07x10 <sup>-3</sup> | -1.50x10 <sup>-2</sup> | 0.761    | -8.77x10 <sup>-3</sup> | 0.651    |
| V3 charge              | -1.38x10 <sup>-2</sup> | -1.71x10 <sup>-2</sup> | 0.900    | -1.54x10 <sup>-2</sup> | 0.237    |
| C3 charge              | 3.50x10 <sup>-2</sup>  | -2.15x10 <sup>-3</sup> | 0.546    | 1.68x10 <sup>-2</sup>  | 0.581    |

<sup>a</sup>Results of mixed model analysis including the interaction between time and progressor group, i.e. the model includes a separate slope for the relationship between the property and time for each group. The *p*-value refers to the test of the interaction, i.e. if the relationship between the property and time differ between groups.

<sup>b</sup>Results of mixed model analysis excluding the interaction between time and progressor group, i.e. the model estimates a common slope for the linear relationship between property and time for all individuals of both groups. This analysis was only performed if the interaction was not significant. The *p*-value refers to the test of the common slope versus zero, i.e if the property changes significantly with time.

<sup>c</sup>Analysis not performed due to limited variation of that property between samples.

\*Denotes significant *p*-value.
